# Supplementary material for: Integrin αVβ3 silencing sensitizes malignant glioma cells to temozolomide by suppression of homologous recombination repair
Source: PubMed Central journal article supplement (PMC5438606; doi:10.18632/oncotarget.10897), 2016-07-28
Supplement: oncotarget-08-27754-s001.pdf [file oncotarget-08-27754-s001.pdf]

# Integrin $\alpha$ V $\beta$ 3 silencing sensitizes malignant glioma cells to temozolomide by suppression of homologous recombination repair

## Supplementary Materials

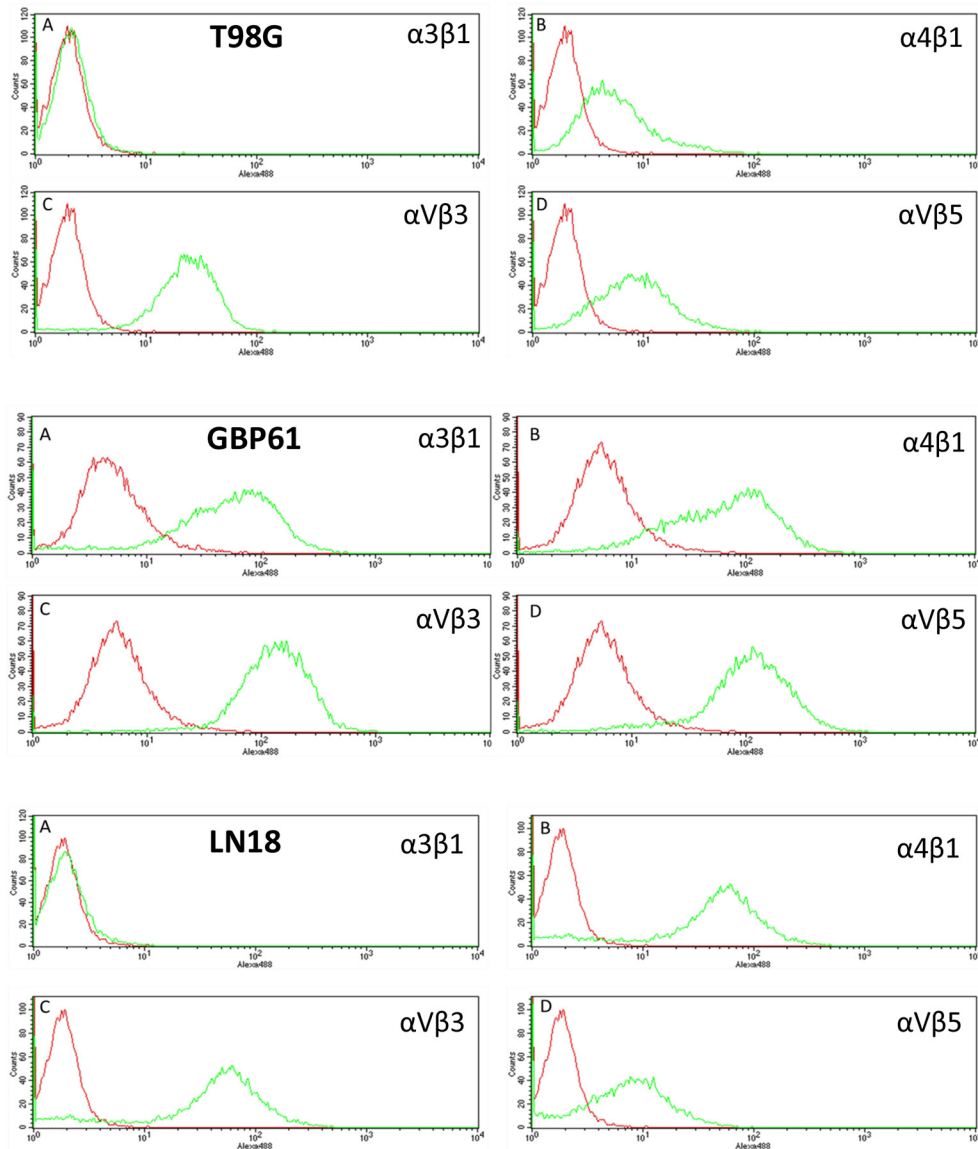

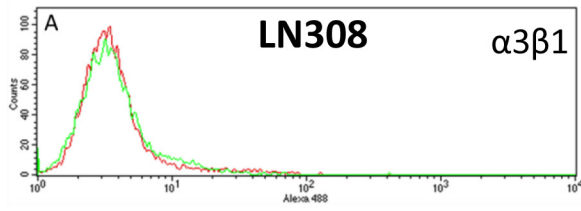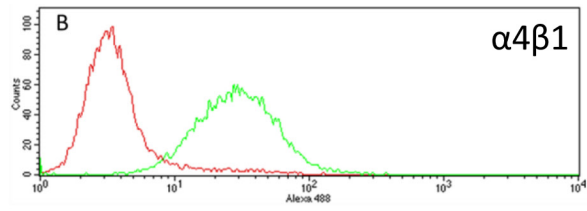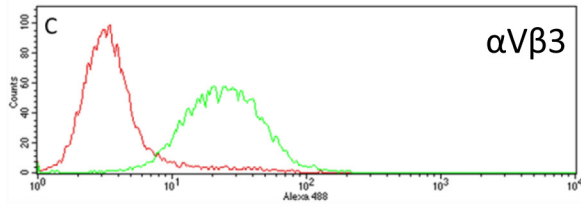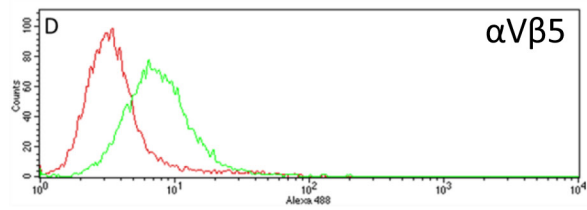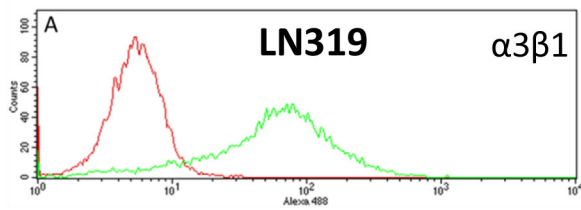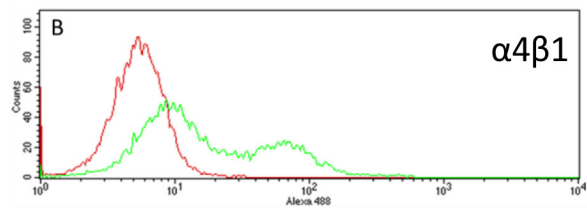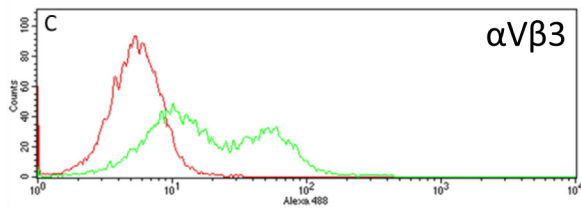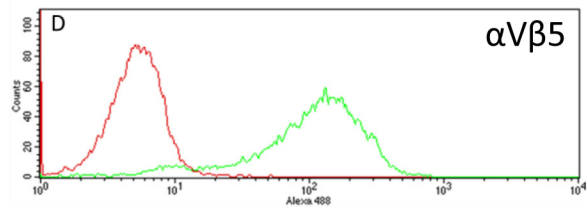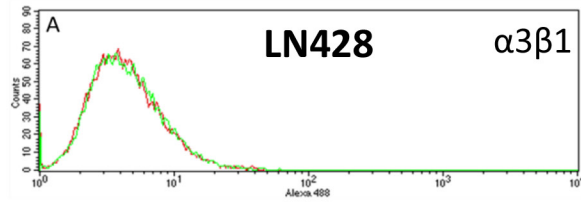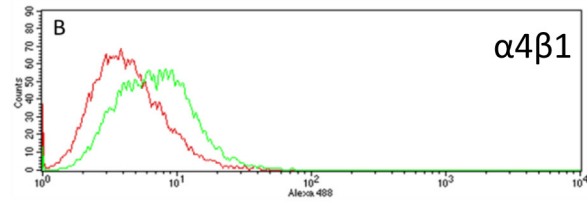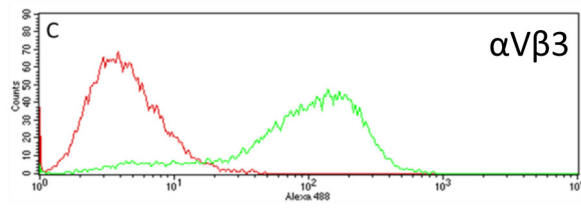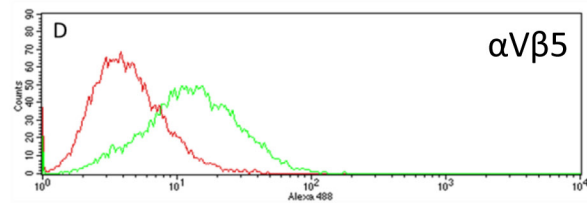

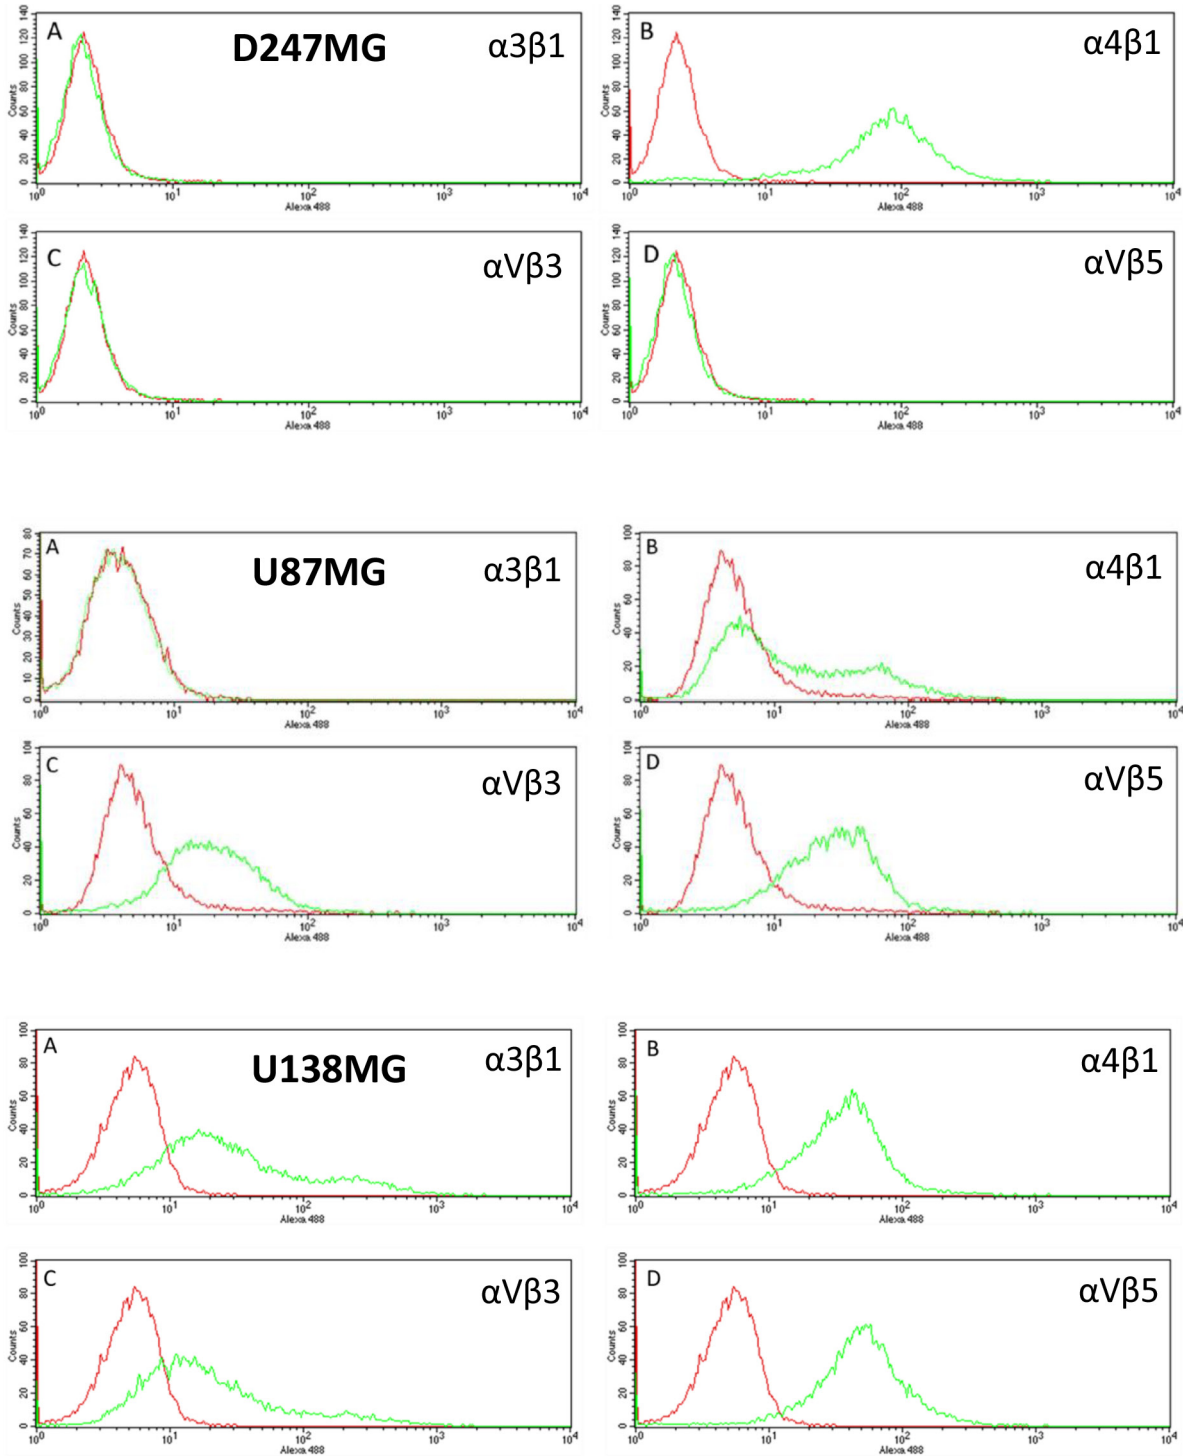

**Supplementary Figure S1: Integrin expression in malignant glioma cell lines.** Histograms of expression of integrin heterodimers  $\alpha3\beta1$ ,  $\alpha4\beta1$ ,  $\alpha V\beta3$  and  $\alpha V\beta5$  in a panel of nine glioma cell lines, as determined by flow cytometry. Red line, no antibodies; green line, specific primary mouse monoclonal antibody plus secondary Alexa Fluor 488-coupled anti-mouse antibody.

## A U138MG

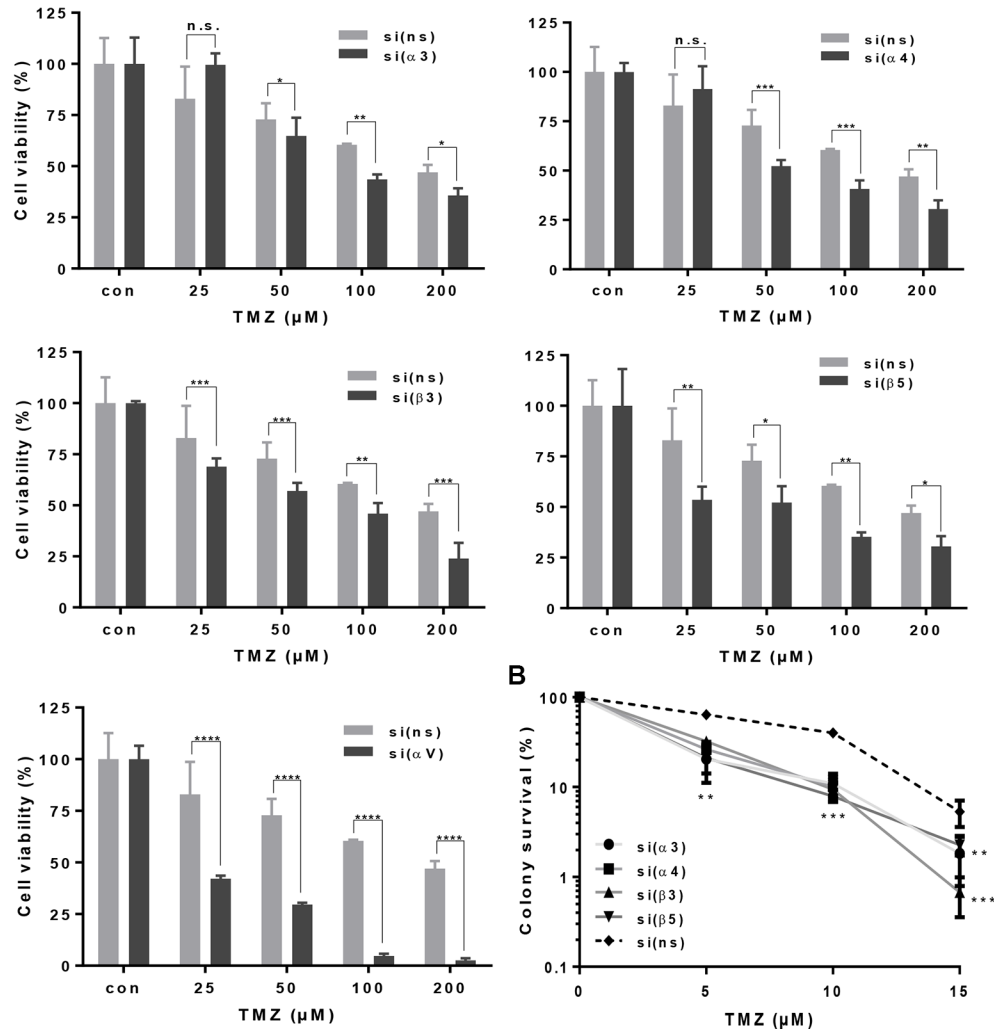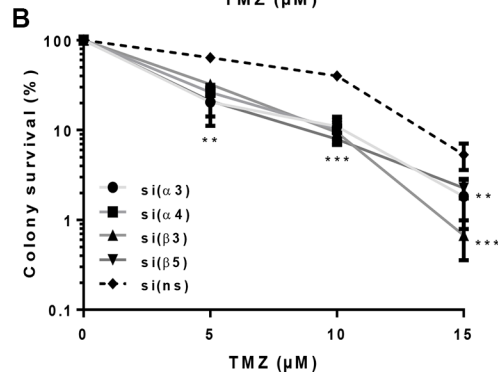

**Supplementary Figure S2: Sensitization to TMZ after specific integrin subunit silencing in U138MG cells.** (A) U138MG cells were transfected with integrin  $\alpha$ V-,  $\alpha$ 3-,  $\alpha$ 4-,  $\beta$ 3-,  $\beta$ 5- or ns-siRNA (50 nM), 24 h later collected by trypsinization and seeded ( $1 \times 10^4$ ) for MTT. After another 24 h the cells were treated with increasing concentrations of TMZ, and after 6 days subjected to MTT staining. The data are the mean of three independent experiments in quadruplicates  $\pm$  SD. (B) U138MG cells were seeded for colony formation assay ( $1 \times 10^3$  cells per 6-cm plate), 24 h later transfected with integrin  $\alpha$ 3-,  $\alpha$ 4-,  $\beta$ 3-,  $\beta$ 5- or ns-siRNA (50 nM) and exposed to TMZ (5–15  $\mu$ M). 14 days later the visible colonies were fixed, stained and counted. The data are the mean of three independent experiments  $\pm$  SD.

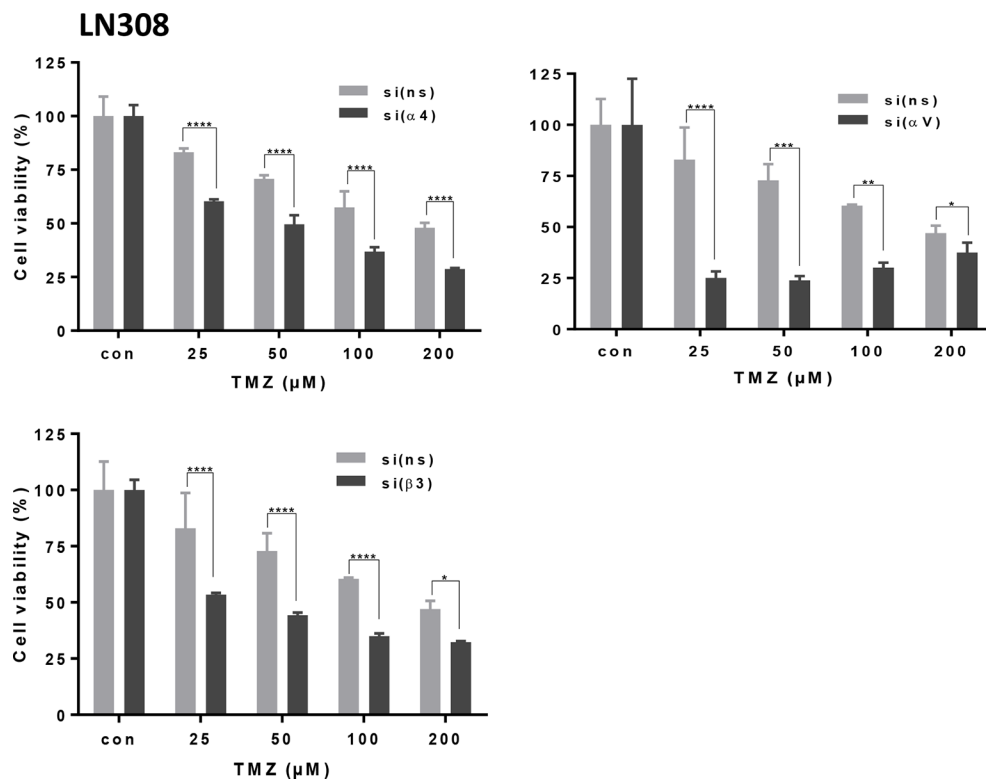

**Supplementary Figure S3: Sensitization to TMZ after specific integrin silencing in LN308 cells.** LN308 cells were transfected with integrin  $\alpha 4$ -,  $\alpha V$ -,  $\beta 3$ - or ns-siRNA (50 nM), 24 h later collected by trypsinization and seeded ( $1 \times 10^4$ ) for cell viability assay (MTT). After another 24 h the cells were treated with increasing concentrations of TMZ, and 6 days later the MTT staining was conducted according to the protocol. The data are the mean of three independent experiments in quadruplicates  $\pm$  SD.

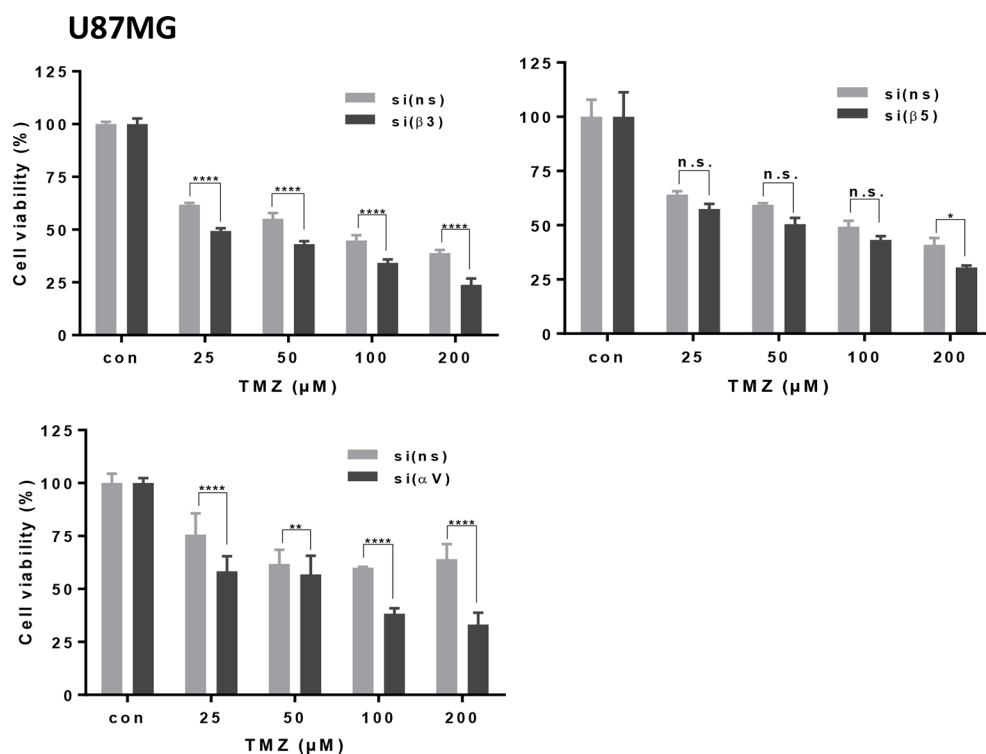

**Supplementary Figure S4: Sensitization to TMZ after specific integrin silencing in U87MG cells.** U87MG cells were transfected with integrin  $\beta 3$ -,  $\beta 5$ -,  $\alpha V$ - or ns-siRNA (50 nM), 24 h later collected by trypsinization and seeded ( $1 \times 10^4$ ) for cell viability assay (MTT). After another 24 h the cells were treated with increasing concentrations of TMZ, and 6 days later the MTT staining was conducted according to the protocol. The data are the mean of three independent experiments in quadruplicates  $\pm$  SD.

### A LN308

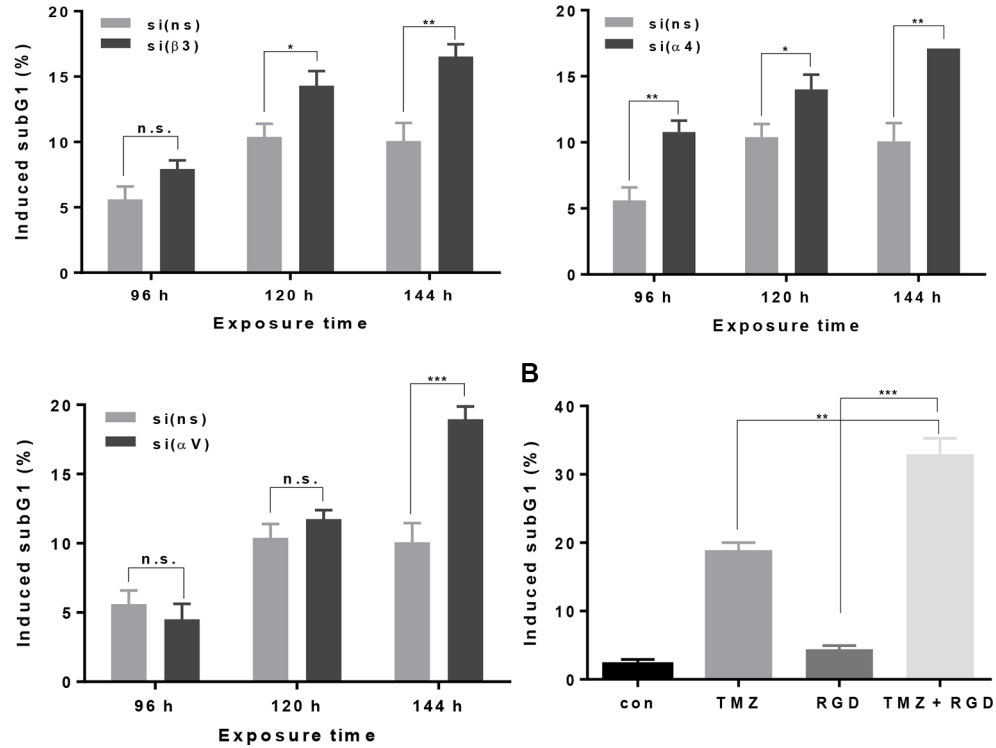

### B

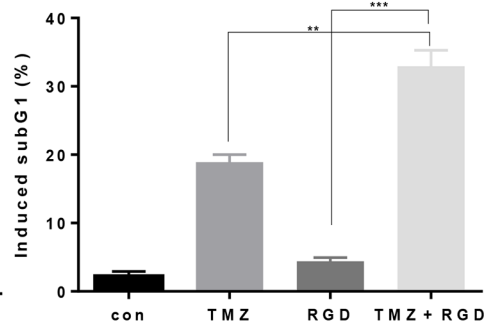

**Supplementary Figure S5: Modulation of apoptosis induction by integrin silencing or pharmacological inhibition in LN308 cells.** (A) LN308 cells were transfected with integrin  $\beta 3$ -,  $\alpha V$ -,  $\alpha 4$ - or ns-siRNA (50 nM) and 48 h later exposed to 100  $\mu$ M TMZ. After 96, 120 and 144 h the cells were collected by trypsinization, incubated by RNase and stained with PI for subG1 flow cytometric analysis. The data are the mean of two independent experiments in duplicates  $\pm$  SD. (B) LN308 cells were pre-treated with a cyclo-RGD integrin antagonist (10  $\mu$ g/mL) alone, or exposed, in addition, to 100  $\mu$ M TMZ. 120 h later, the cells were subjected to subG1 flow cytometric analysis. The data are the mean of two independent experiments in duplicates  $\pm$  SD.

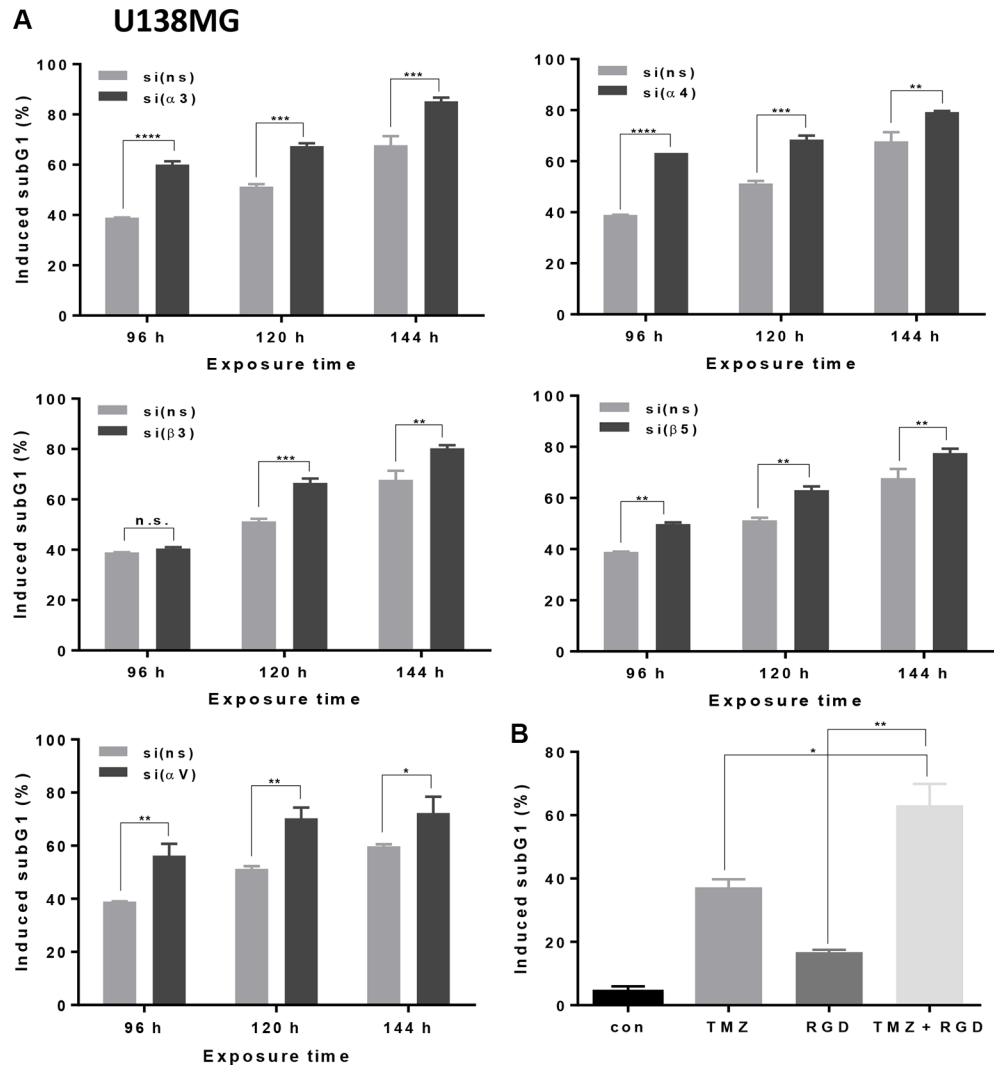

**Supplementary Figure S6: Modulation of apoptosis induction by integrin silencing or pharmacological inhibition in U138MG cells.** (A) U138MG cells were transfected with integrin  $\alpha 3$ -,  $\alpha 4$ -,  $\beta 3$ -,  $\beta 5$ -,  $\alpha V$ - or ns-siRNA (50 nM) and 48 h later exposed to 100  $\mu$ M TMZ. After 96, 120 and 144 h the cells were collected by trypsinization, incubated by RNase and stained with PI for subG1 flow cytometric analysis. The data are the mean of two independent experiments in duplicates  $\pm$  SD. (B) U138MG cells were pre-treated with a cyclo-RGD integrin antagonist (10  $\mu$ g/mL) alone, or exposed, in addition, to 100  $\mu$ M TMZ. 120 h later, the cells were subjected to subG1 flow cytometric analysis. The data are the mean of two independent experiments in duplicates  $\pm$  SD.

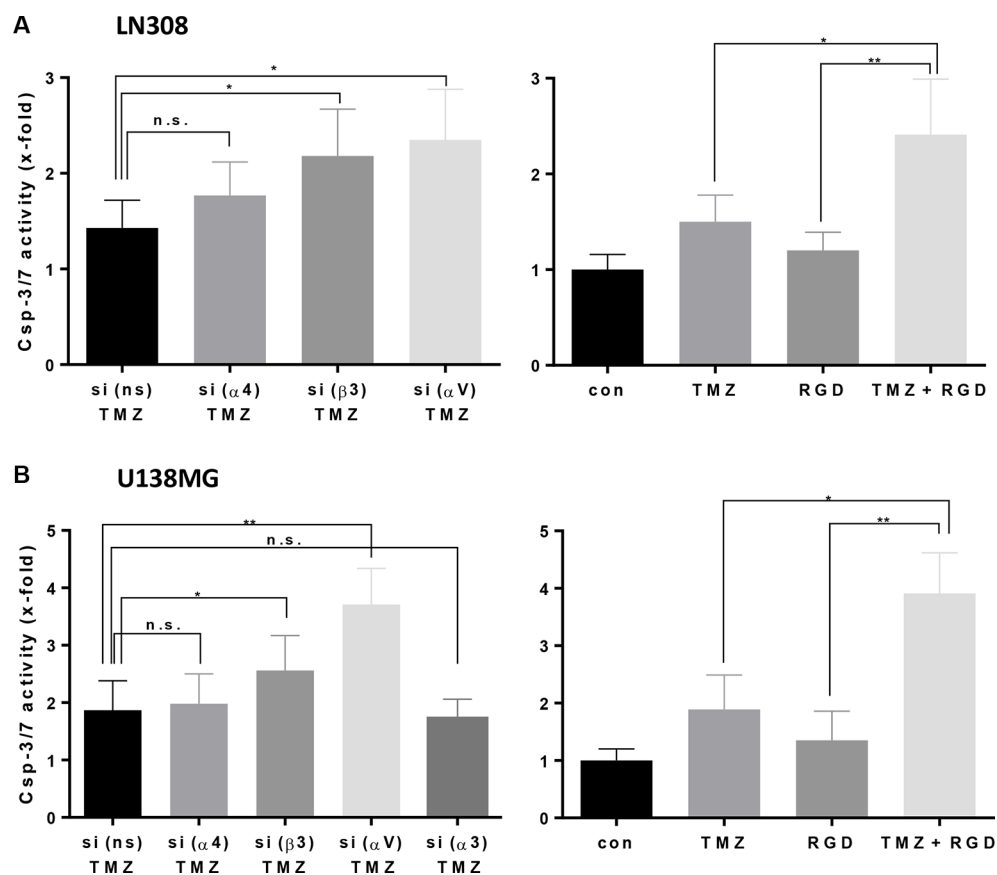

**Supplementary Figure S7: Induction of caspase-3/7 activity by integrin silencing or pharmacological inhibition. (A, B.)** LN308 and U138MG cells were transfected with integrin  $\alpha 3$ -,  $\alpha 4$ -,  $\beta 3$ -,  $\beta 5$ -,  $\alpha V$ - or ns-siRNA (50 nM) and 24 h later re-seeded in 96-well plates. After additional 24 h cells were exposed to 100  $\mu$ M TMZ. After 120 h appropriate substrate was added to the cells. Alternatively cells seeded in the 96-well plates were left unexposed or for 120 h exposed to the cyclo-RGD inhibitor (10  $\mu$ g/mL), 100  $\mu$ M TMZ or both. One hour after addition of caspase-3/7 peptide substrate, fluorometric signal was measured and the values of the integrin-specific siRNA transfected and TMZ-exposed cells were expressed as x-fold induction relative to the integrin-specific siRNA transfected cells, that were set to 1. The data are the mean of two independent experiments in duplicates  $\pm$  SD.



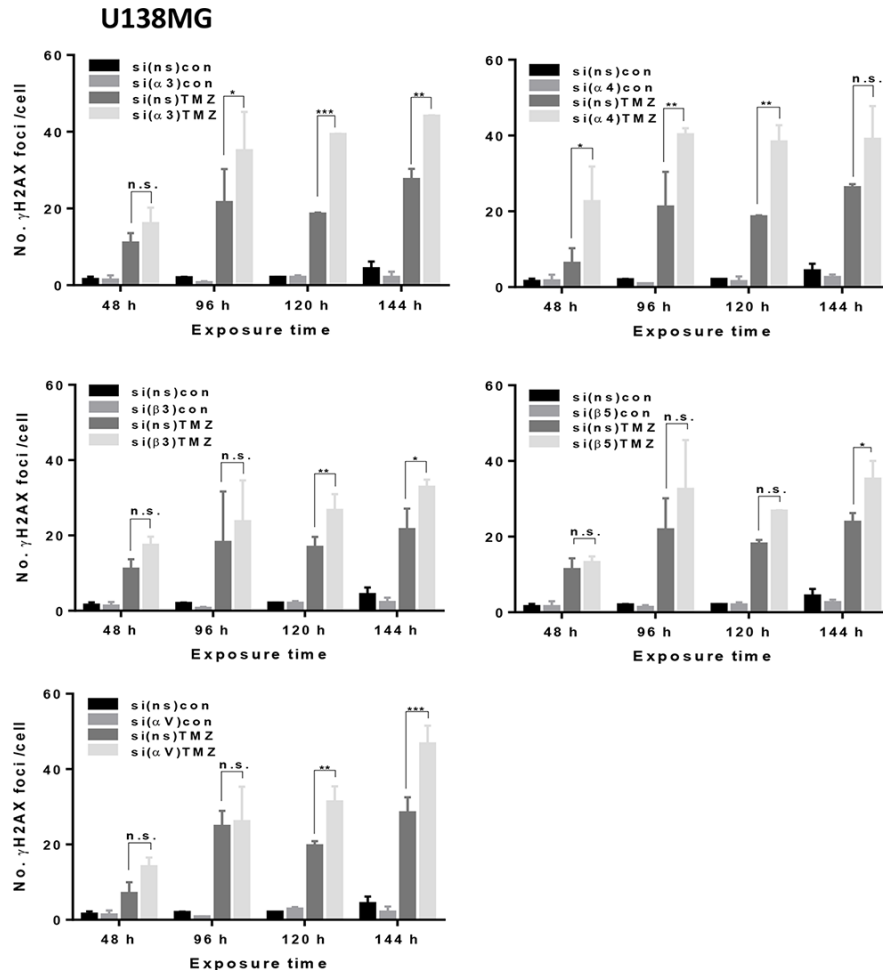

**Supplementary Figure S8: Induction of  $\gamma$ H2AX foci upon integrin silencing and TMZ treatment.** U138MG cells were transfected with integrin  $\alpha 3$ -,  $\alpha 4$ -,  $\beta 3$ -,  $\beta 5$ -,  $\alpha V$ - or ns-siRNA (50 nM) and exposed to 100  $\mu$ M TMZ. After 48–144 h, the cells were fixed on cover slips and stained with anti- $\gamma$ H2AX antibody. Foci (in green) were automatically counted with Metafer4 software. The data are the mean of two independent experiments in duplicates  $\pm$  SD.

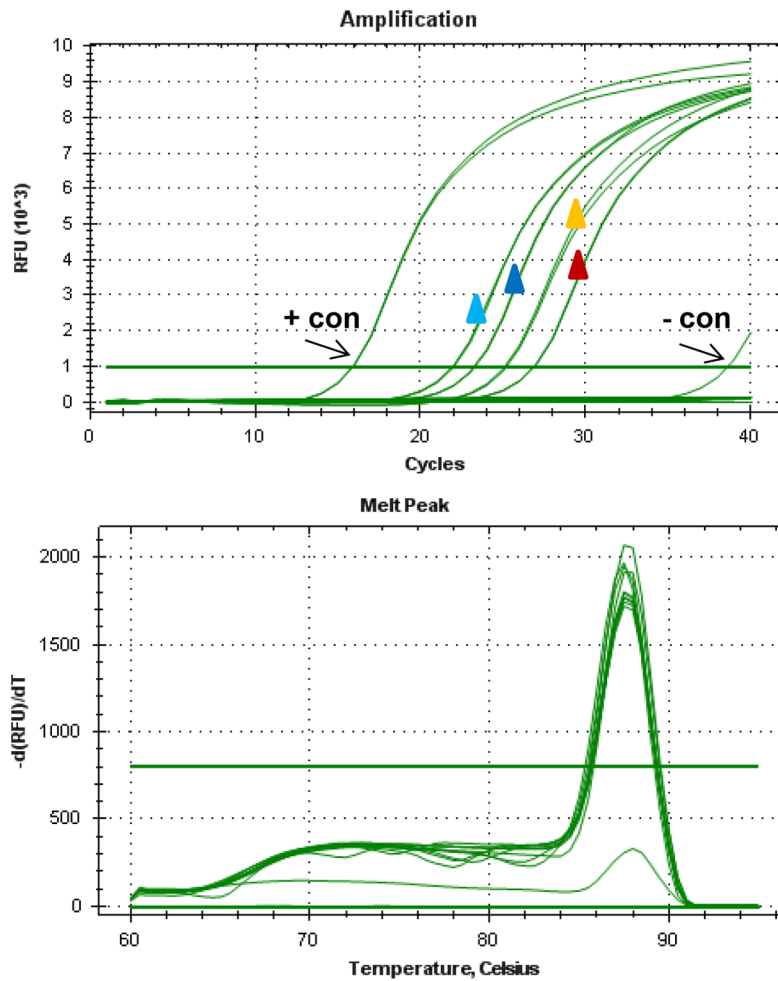

**Supplementary Figure S9: HR efficiency assay.** Melting curves of the qPCR samples calculated for homologous recombination (HR) efficiency (Norgen Biotek Corp., Canada). C<sub>q</sub> for amplification of the positive control plasmid (+con) ~16, for the negative control (-con) showing unrepaired plasmid ~38. HR efficiency differs between the samples, showing C<sub>q</sub> values ~22 for ns-si (light blue triangle), ~23 for β3-si (dark blue triangle), ~25 for ns-si/TMZ & TMZ (orange triangle) and ~27 for β3-si/TMZ (red triangle).

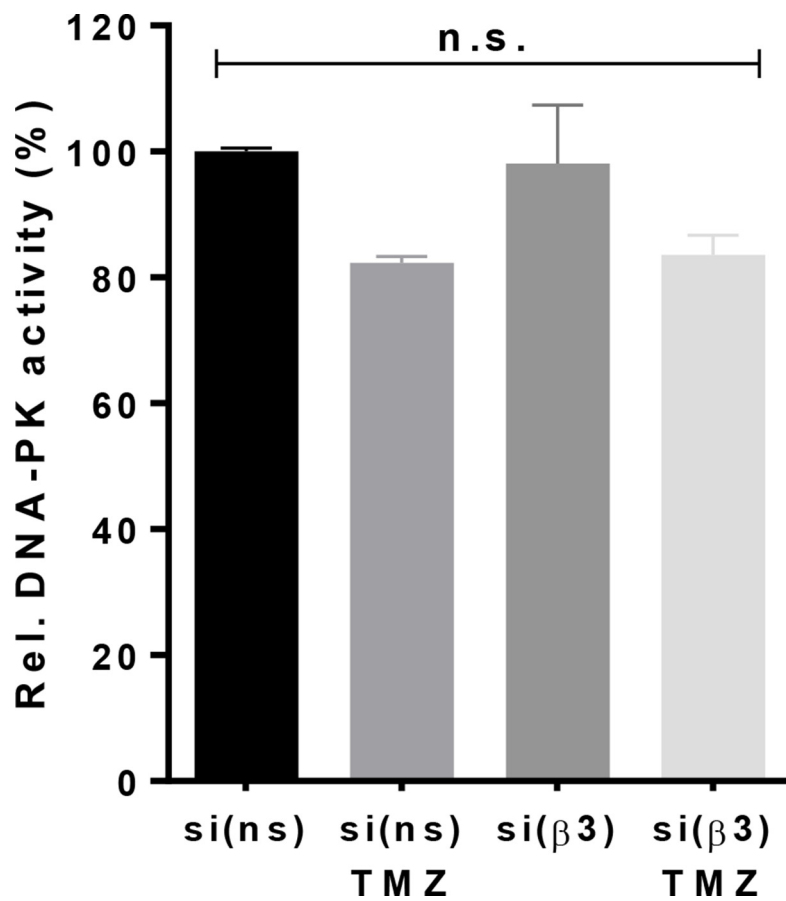

**Supplementary Figure S10: : DNA-PK assay.** LN229 cells were transfected with si(ns) or  $\beta$ 3-siRNA and 24 h later exposed to 100  $\mu$ M TMZ. DNA-PKcs activity using radioactive assay was performed in whole-cell extracts according to the manufacturer's protocol (Promega). n.s., not significant

**Supplementary Table S1: Antibody list**

| <b>Epitope</b>                               | <b>Antibody type / Source / Dilution</b>                 |
|----------------------------------------------|----------------------------------------------------------|
| FAK <sup>y397</sup>                          | pAb/Abcam/1:2000                                         |
| FAK                                          | pAb/Abcam/1:2000                                         |
| Src <sup>y418</sup>                          | pAb/Abcam/1:2000                                         |
| Src                                          | pAb/Abcam/1:2000                                         |
| Rad51                                        | pAb/Abcam/1:10000                                        |
| $\gamma$ H2AX <sup>S139</sup>                | mAb/Merck Millipore/1:1000 (IF)<br>mAb/Abcam/1:1000 (WB) |
| H2AX                                         | pAb/Merck Millipore/1:1500                               |
| Caspase-3 (p17/19)                           | pAb/Cell Signaling Technology/1:1000                     |
| Pro-caspase-2                                | mAb/Cell Signaling Technology/1:1000                     |
| RIP1                                         | mAb/BD Transduction Laboratories/1:1000                  |
| Akt <sup>S473</sup>                          | pAb/Cell Signaling Technology/1:1000                     |
| Akt                                          | pAb/Cell Signaling Technology/1:1000                     |
| I $\kappa$ B $\alpha$                        | pAb/Cell Signaling Technology                            |
| XIAP                                         | mAb/BD Pharmingen/1:1000                                 |
| Survivin                                     | mAb/R&D Systems/1:1000                                   |
| Bcl-xL                                       | mAb/ Santa Cruz Technology/1:1000                        |
| $\beta$ -Actin                               | mAb/Santa Cruz Biotechnology/1:1000                      |
| Hsp90                                        | mAb/Santa Cruz Biotechnology/1:1500                      |
| HRP-conjugated anti-mouse/rabbit             | IgG/Rockland/1:2000                                      |
| $\alpha$ V $\beta$ 3                         | mAb/Merck Millipore/1:1000                               |
| $\alpha$ V $\beta$ 5                         | mAb/Merck Millipore/1:1000                               |
| $\alpha$ 3 $\beta$ 1                         | mAb/Merck Millipore/1:1000                               |
| $\alpha$ 4                                   | mAb/Merck Millipore/1:1000                               |
| goat Alexa Fluor <sup>®</sup> 488 anti-mouse | mAb/Life Technologies/1:1000                             |
